# Supplementary material for: 3D structured porous CoP3 nanoneedle arrays as an efficient bifunctional electrocatalyst for the evolution reaction of hydrogen and oxygen
Source: Royal Society of Chemistry journal article supplement (doi:10.1039/c6ta05838h), 2016-01-01
Supplement: c6ta05838h1.pdf [file c6ta05838h1.pdf]

*Electronic Supplementary Information*

**3D structured porous CoP<sub>3</sub> nanoneedle arrays as an efficient bifunctional electrocatalyst for the evolution reaction of hydrogen and oxygen**

Tianli Wu,<sup>a</sup> Mingyu Pi,<sup>a</sup> Dingke Zhang<sup>b</sup> and Shijian Chen<sup>a\*</sup>

<sup>a</sup> School of Physics, Chongqing University, Chongqing, 401331, China

<sup>b</sup> College of Physics and Electronic Engineering, Chongqing Normal

University, Chongqing, 401331, China.

**Experimental Section**

**Materials:** Co(NO<sub>3</sub>)<sub>3</sub>·6H<sub>2</sub>O, NH<sub>4</sub>F, and urea were purchased from Aladdin Ltd. (Shanghai, China). NaH<sub>2</sub>PO<sub>4</sub> and Na<sub>2</sub>HPO<sub>4</sub> (Chengdu Chemical Corp) were used for preparation of PBS. H<sub>2</sub>SO<sub>4</sub> and KOH were purchased from Aladdin Lth. (Shanghai, China). Nafion ethanol solution (5 wt%) and Commercial Pt/C (20 wt%) catalysts were purchased from Alfa Aesar. All other chemical reagents used in this study were analytical grade without further purification. Carbon fiber paper (CFP) is provided by Shanghai Hesen Corp. All aqueous solutions were prepared with ultrapure water (> 18.25 MΩ·cm) obtained from Millipore system.

**Preparation of Co(OH)F/CFP and CoP<sub>3</sub>/CFP:** Co(OH)F/CFP was prepared as follows. In a typical synthesis, Co(NO<sub>3</sub>)<sub>2</sub>·6H<sub>2</sub>O (0.582 g), NH<sub>4</sub>F (0.186 g) and urea (0.60 g) were dissolved in 40 mL water under vigorous stirring for 30 min. Then the solution was transferred into a Teflon-lined stainless autoclave (50 mL) and a piece of CFP (3 cm × 1.8 cm), which was cleaned by sonication sequentially in acetone, water and ethanol for 10 min each, was immersed into the solution. The autoclave was sealed and maintained at 120 °C for 6 h in an electric oven. After the autoclave cooled down slowly at room temperature, the Co(OH)F/CFP was taken out and washed with water thoroughly before vacuum dried. To prepare CoP<sub>3</sub> NAs/CFP, a piece of the Co(OH)F

NAs/CFP (0.6 cm\*1.5 cm) and 30 mg red phosphorus were put into a quartz tube and vacuum-sealed ( $10^{-5}$  Pa) and then these sealed quartz tubes were placed in a chamber furnace and heat treated at 750 °C for 5 hours. The final reaction products were thoroughly washed with deionized water, ethanol and dried under 50 °C for 10 h.

**Preparation of CoP<sub>3</sub> nanoparticles:** The CoP<sub>3</sub> nanoparticles were synthesized through a solid-state reaction method. In a typical synthesis, First, Co<sub>3</sub>O<sub>4</sub> bulk were prepared by calcining 1.0 g Co(NO<sub>3</sub>)<sub>3</sub>·6H<sub>2</sub>O at 300 °C for 5h with a heating rate of 10 °C min<sup>-1</sup> in air. Furthermore, 0.1 g of Co<sub>3</sub>O<sub>4</sub> and 0.2 g of red phosphorus (P) were mixed uniformly and vacuum-sealed ( $10^{-5}$  Pa) in a quartz tube, and then these sealed quartz tubes were placed in a chamber furnace and heat treated at 750 °C for 5 hours. The final reaction products were thoroughly washed with deionized water, ethanol and dried under 50 °C for 10 h.

**Characterization:** X-ray diffraction analysis (XRD) was conducted by using a PANalytical X'pert diffractometer operating at 40 kV and 50 mA using Cu K $\alpha$  radiation. Field emission scanning electron microscopy (FE-SEM, TESCAN MARI3) and transmission electron microscopy (TEM, FEI TECNAI G2 F20) coupled with Energy dispersive X-ray spectroscopy (EDS), were applied for the morphologies, sizes, compositions and structures of the samples. X-ray photoelectron spectroscopy (XPS) measurement were performed on a Thermo ESCALAB 250Xi with an Al K $\alpha$  (1486.6 eV) X-ray source on the samples. The energy calibrations were preferred the C 1s peak at 284.6 eV to eliminate the charging of the sample during analysis. Nitrogen adsorption-desorption isotherms were obtained on a Quantachrome NOVA 1000 system with all samples degassed at 100 °C prior to measurements. Gas chromatography measurements were conducted on GC-9790 (Fuli Co., China) with thermal conductivity detector.

**Electrode preparation and electrochemical measurements:** Polarization curves of the HER in 0.5 M H<sub>2</sub>SO<sub>4</sub> were performed using an electrochemical workstation (CHI 660E, CH Instruments, Chenhua Co., Shanghai, China) at room temperature. Saturated calomel electrode (SCE) and Pt foil were used as the reference and counter electrodes, respectively. The SCE electrode was calibrated with respect to the reversible hydrogen

electrode (RHE). Catalyst ink was typically made by dispersing 10 mg of catalyst into 2 mL of water/ethanol (V/V=950:1000) solvent. After adding 50  $\mu\text{L}$  of 5 wt% of Nafion solution and sonicated for at least 30 min, 50  $\mu\text{L}$  of this catalyst ink dispersion (containing 0.25 mg of catalyst) was loaded onto a carbon fiber paper (CFP) to achieve the sample loading 1  $\text{mg cm}^{-2}$ . Polarization data is collected at the scan rate of 2  $\text{mV}\cdot\text{s}^{-1}$ . The time dependency of catalytic currents during electrolysis for the catalyst was tested in 0.5 M  $\text{H}_2\text{SO}_4$  at potentiostatic voltage. AC impedance measurements was carried out in a potentiostatic mode in the frequency range of 0.01 Hz to  $10^5$  Hz.

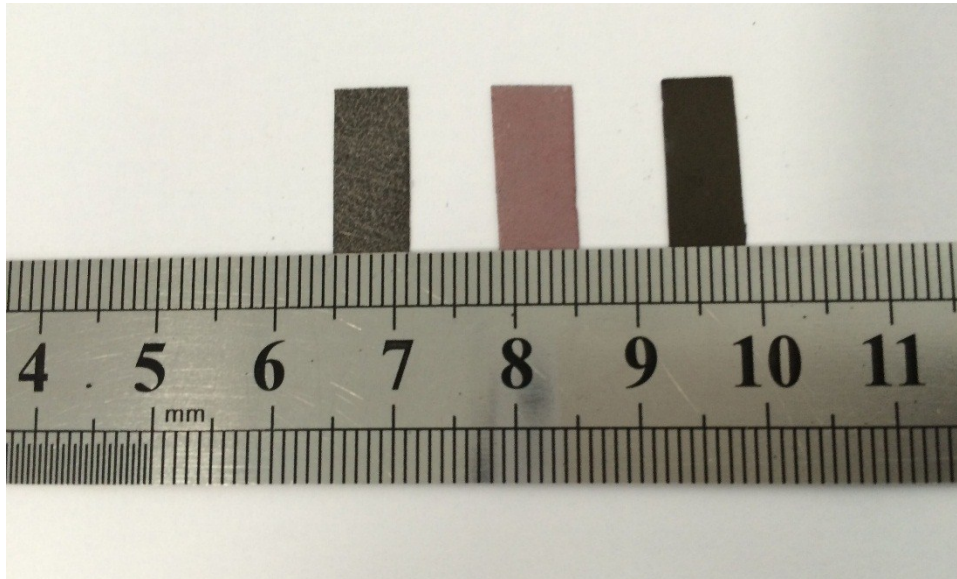

**Fig. S1** Optical photograph (from left to right) of blank CFP, Co(OH)F/CFP, and CoP<sub>3</sub> NAs/CFP.

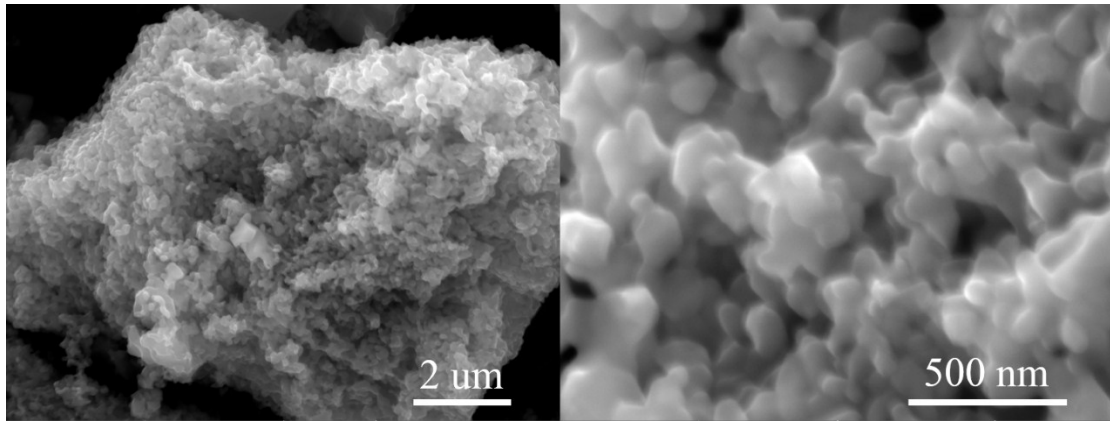

**Fig. S2** Low- and high- magnification SEM images of CoP<sub>3</sub> NPs.

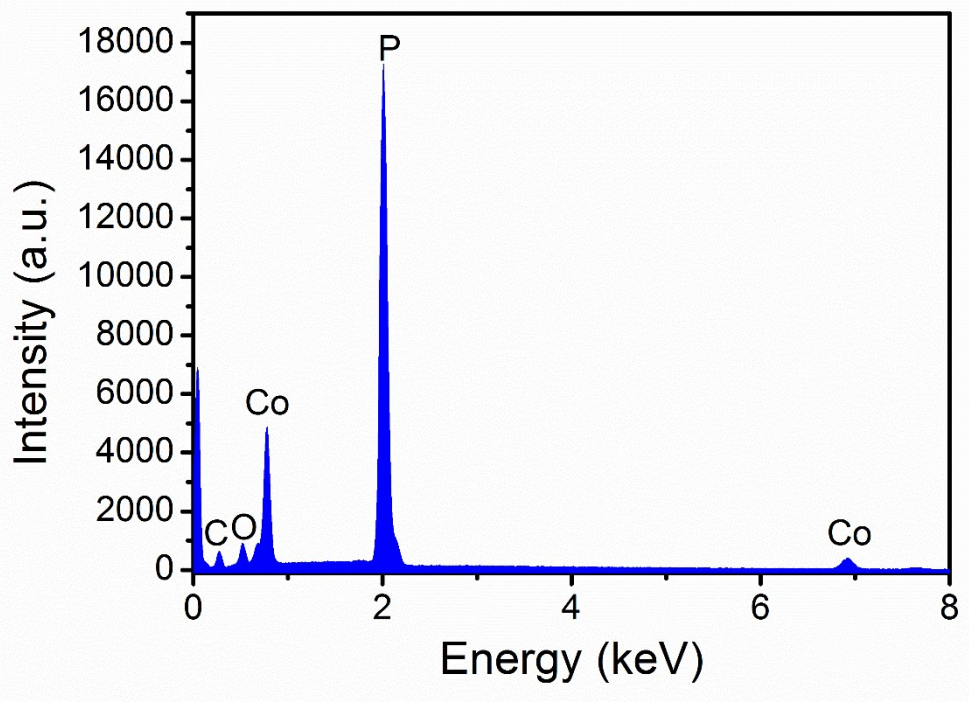

**Fig. S3** EDX spectrum of  $\text{CoP}_3$  nanoneedles.

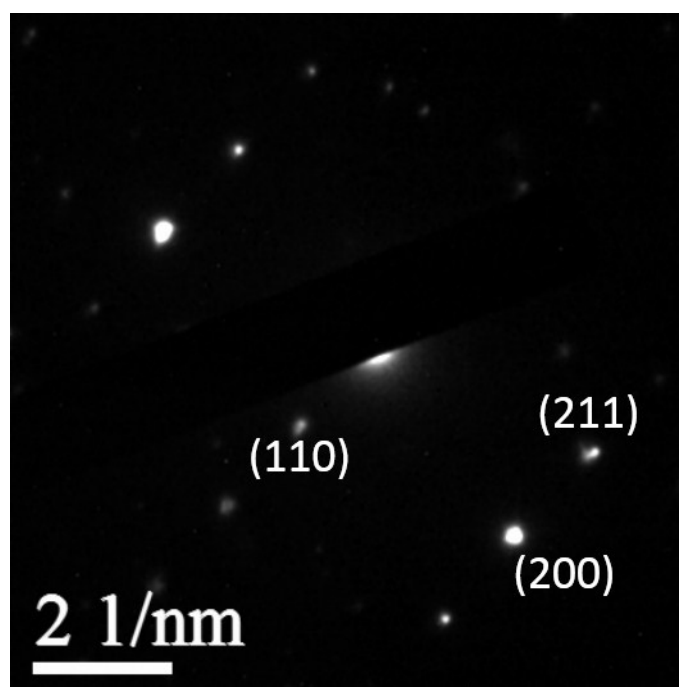

**Fig. S4** SAED pattern of CoP<sub>3</sub> nanoneedles.

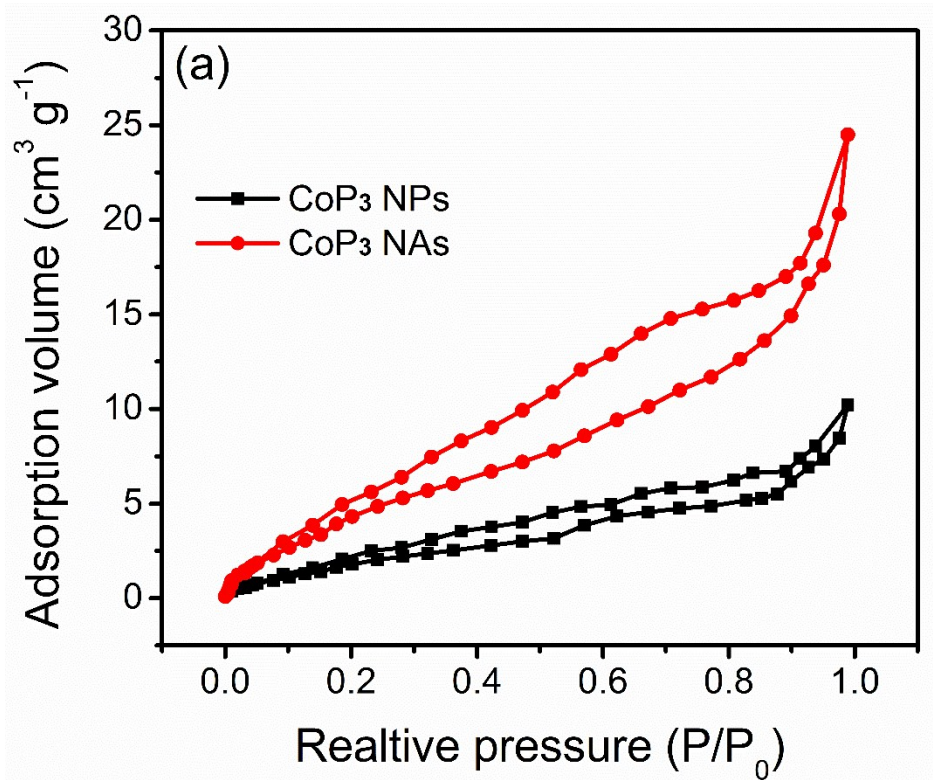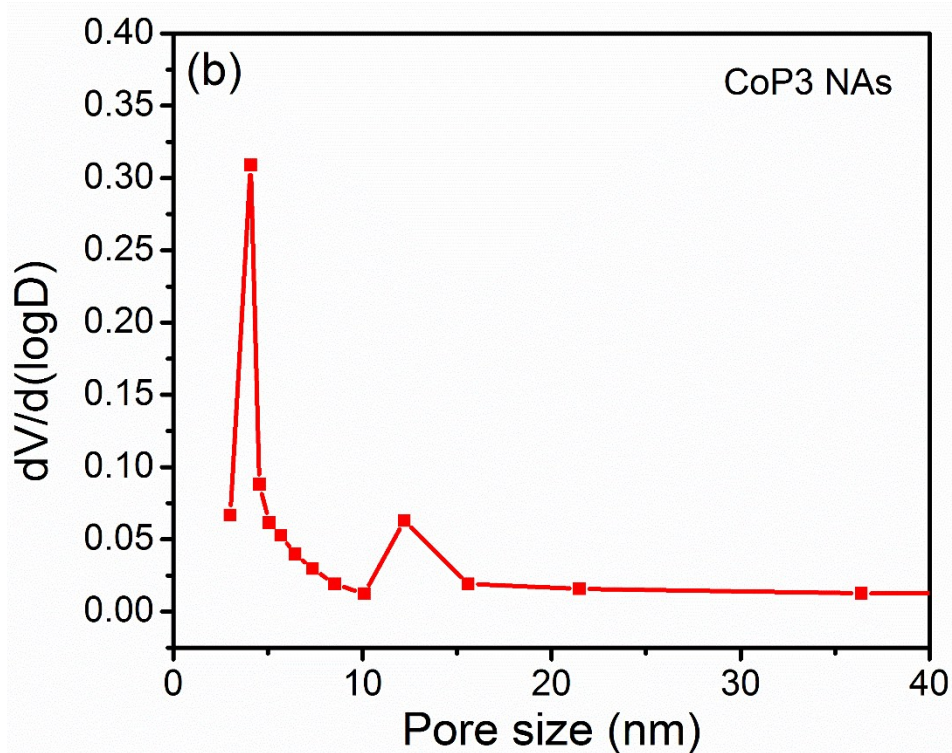

**Fig. S5** (a) Nitrogen adsorption/desorption isotherm and (b) the BJH pore-size distribution curve (inset) of CoP<sub>3</sub> NAs/CFP.



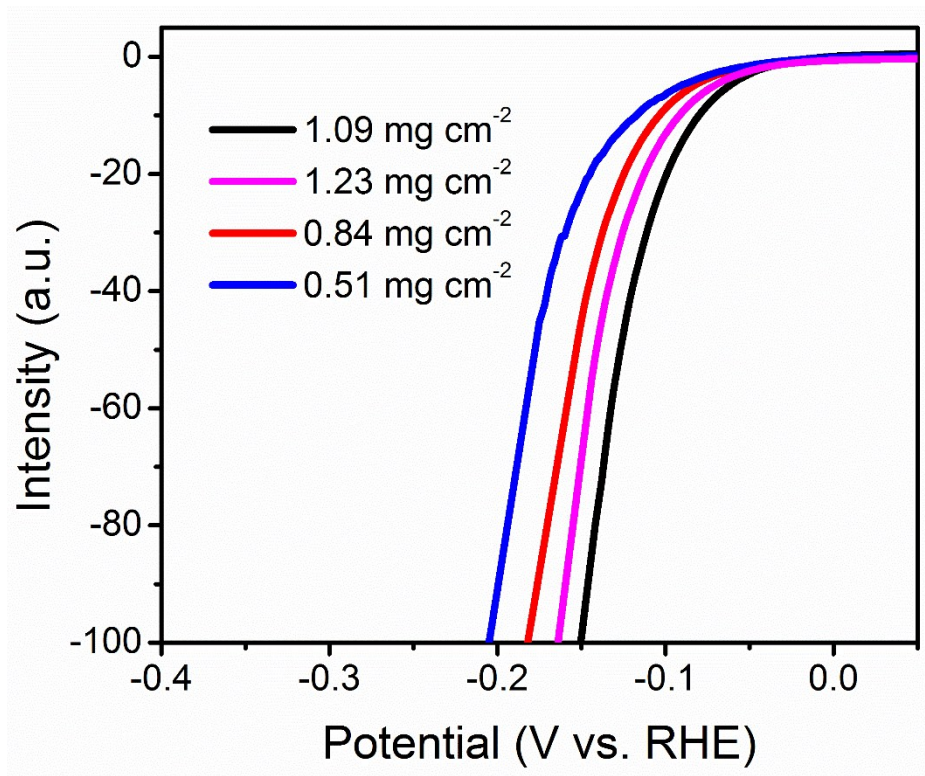

**Fig. S6** Polarization curves of the CoP<sub>3</sub> NAs/CFP with different CoP<sub>3</sub> loading in 0.5 M H<sub>2</sub>SO<sub>4</sub> with a scan rate of 2 mV/s.

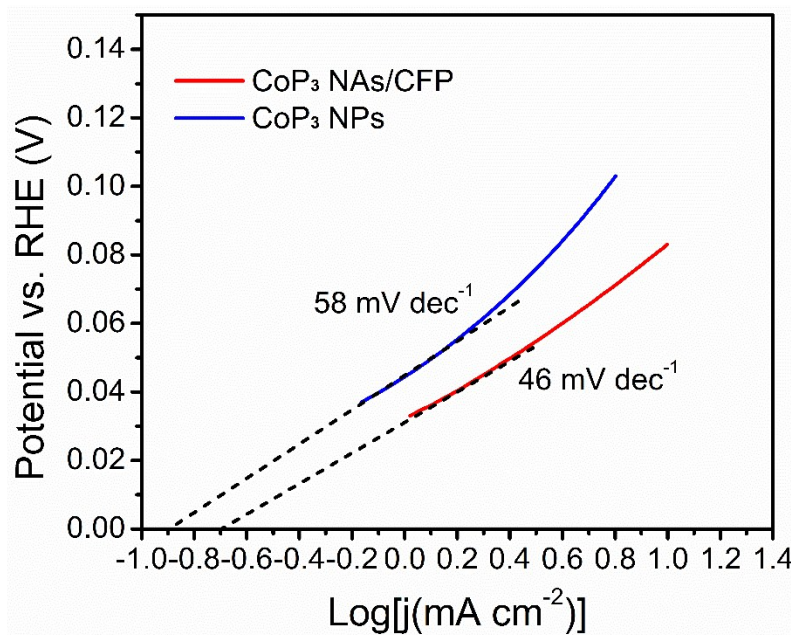

**Fig. S7** Calculated exchange current density of the CoP<sub>3</sub> NAs/CFP by applying extrapolation method to the Tafel plot.

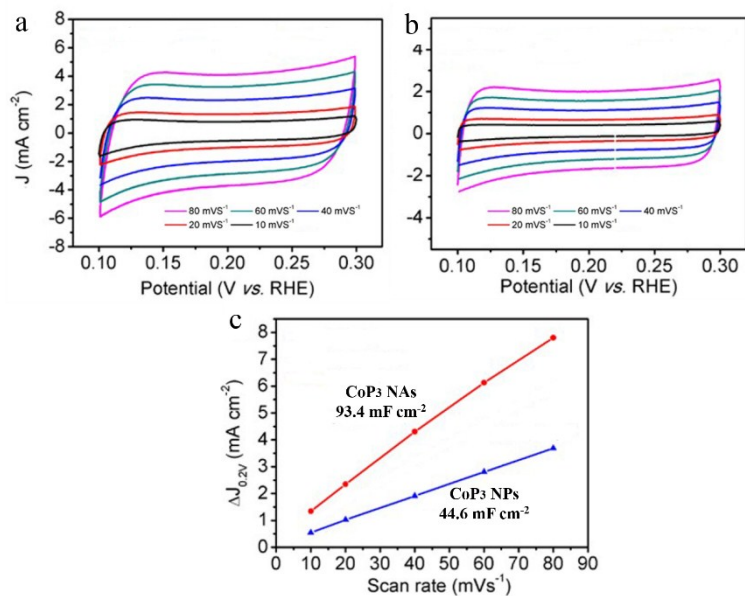

**Fig. S8** Cyclic voltammograms in the region of 0.1-0.3 V vs. RHE at various scan rates and the corresponding linear fitting of the capacitive currents vs. scan rates to estimate the double layer capacitance: (a) CoP<sub>3</sub> NAs/CFP and (b) CoP<sub>3</sub> NPs/CFP; (c) The capacitive currents were measured at 0.20 V vs. RHE plotted as a function of scan rate.

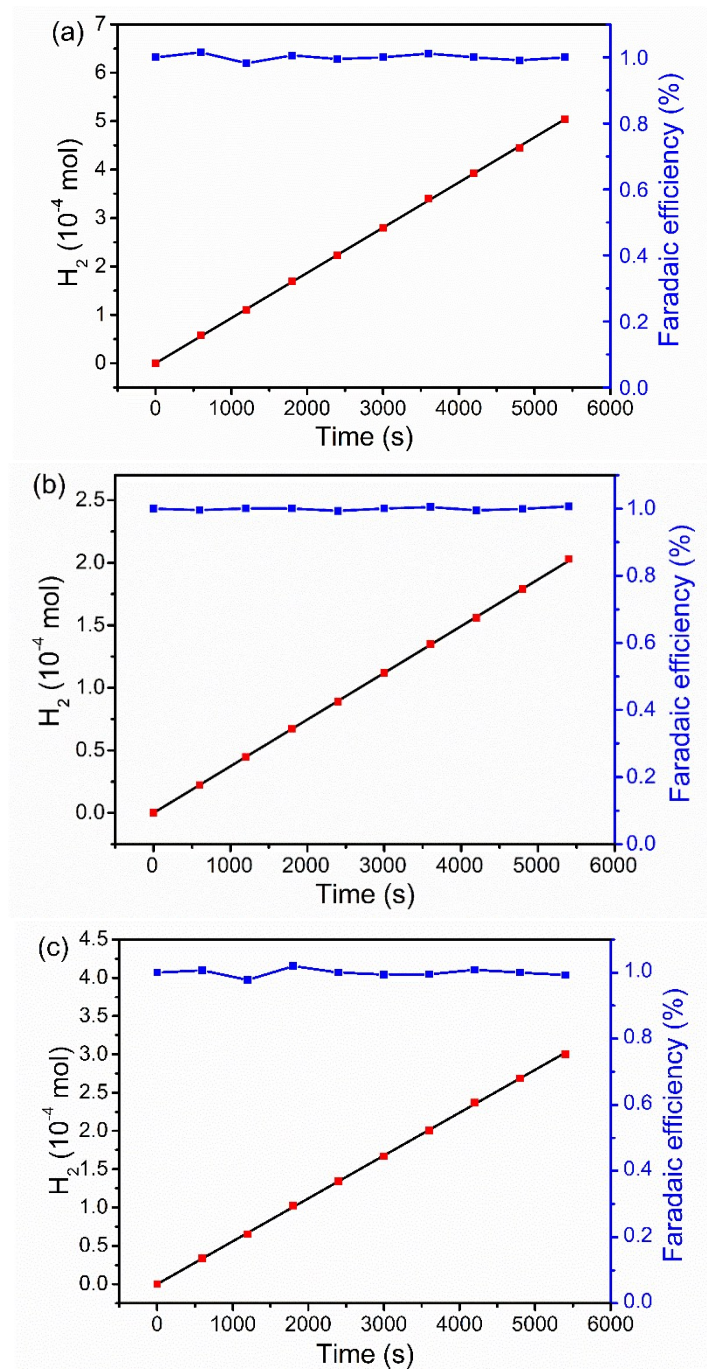

**Fig. S9** The amount of H<sub>2</sub> theoretically calculated (solid) and experimentally measured (red sphere) versus time for CoP<sub>3</sub> NAs/CFP at (a) pH 0 under an overpotential of 115 mV for 90 min, (b) pH 6.8 under overpotentials of 200 mV for 60 min. and (c) pH 14 under overpotentials of 160 mV for 60 min.

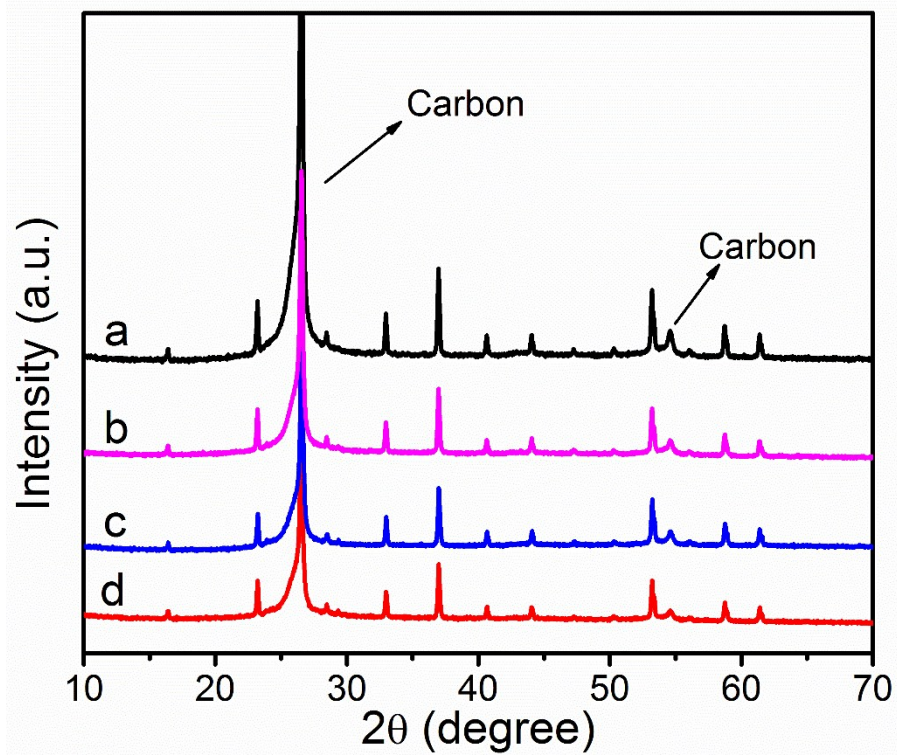

**Fig. S10** XRD patterns of  $\text{CoP}_3$  NAs/CFP (a) before and after 5000 cycles CV scanning at (b) pH 0, (c) pH 6.8, and (d) pH 14.

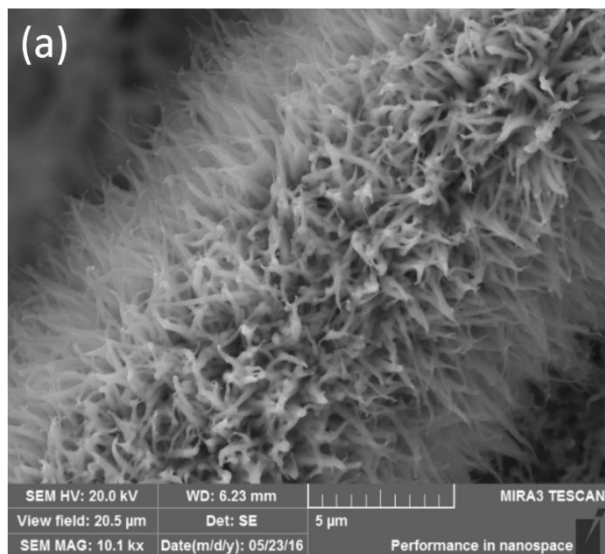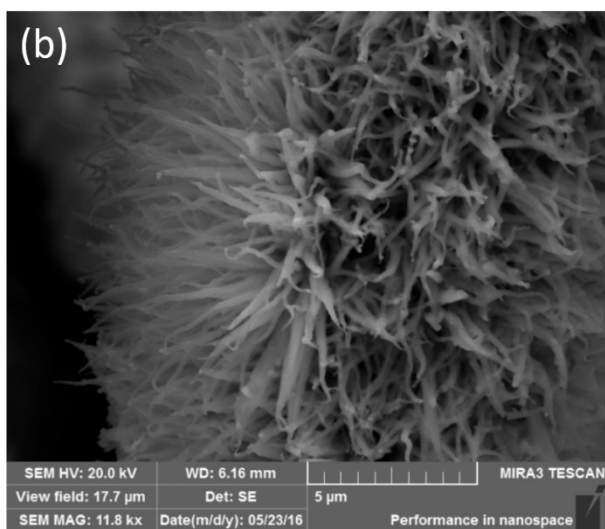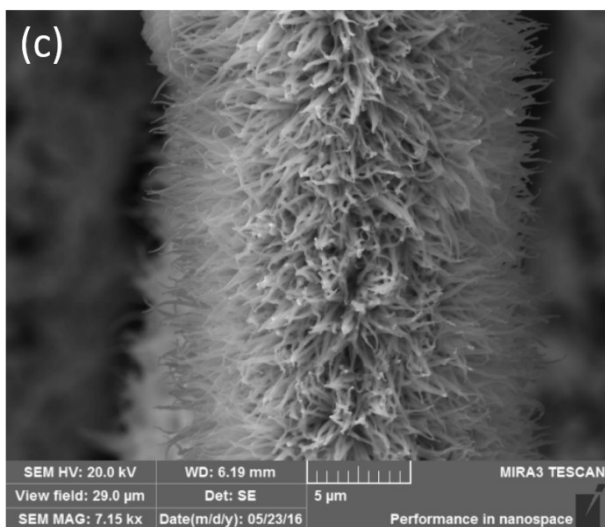

**Fig. S11** SEM images of CoP<sub>3</sub> NAs/CFP after 5000 cycles CV scanning at (a) pH 0, (b) pH 6.8, and (c) pH 14.

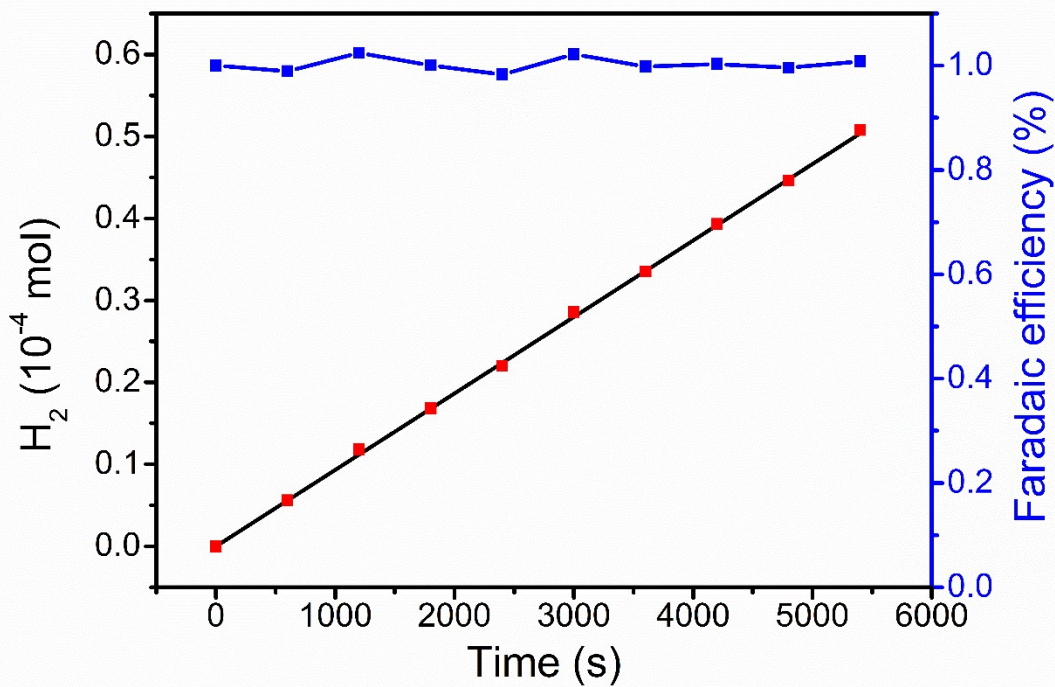

**Fig. S12** The amount of O<sub>2</sub> theoretically calculated (solid) and experimentally measured (red sphere) versus time for the CoP<sub>3</sub> NAs/CFP at pH 14 under overpotentials of 334 mV for 90 min.

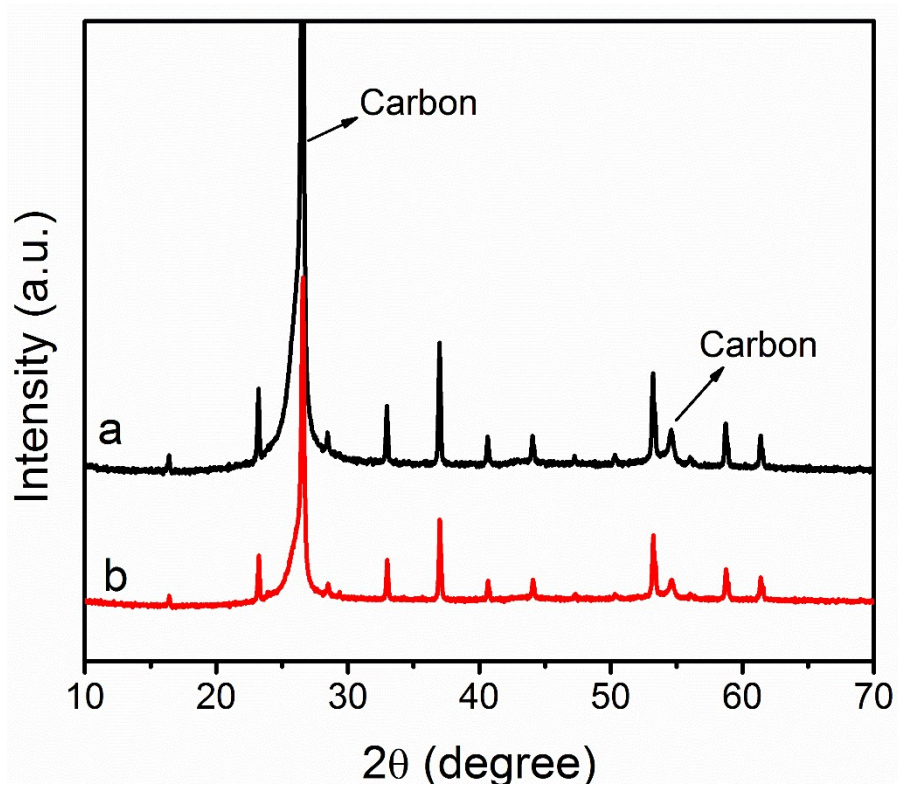

**Fig. 13** XRD patterns of the  $\text{CoP}_3$  NAs/CFP before and after 5000 cycles CV scanning at pH 14.



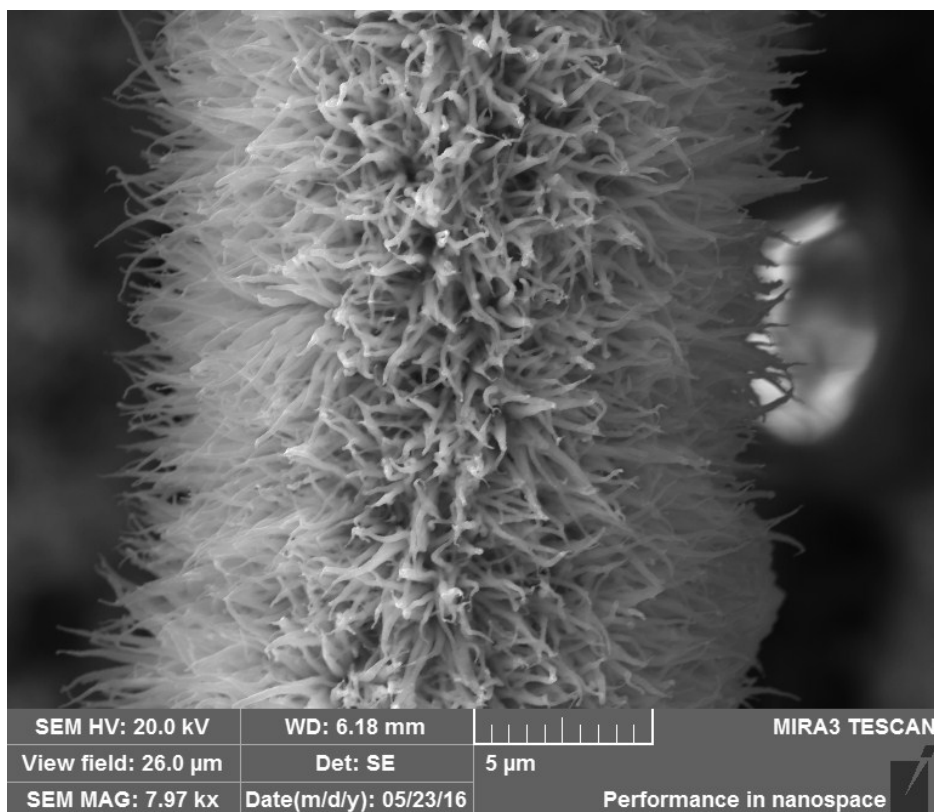

**Fig. S14** SEM images of the CoP<sub>3</sub> NAs/CFP after 5000 cycles CV scanning at pH 14 for OER.

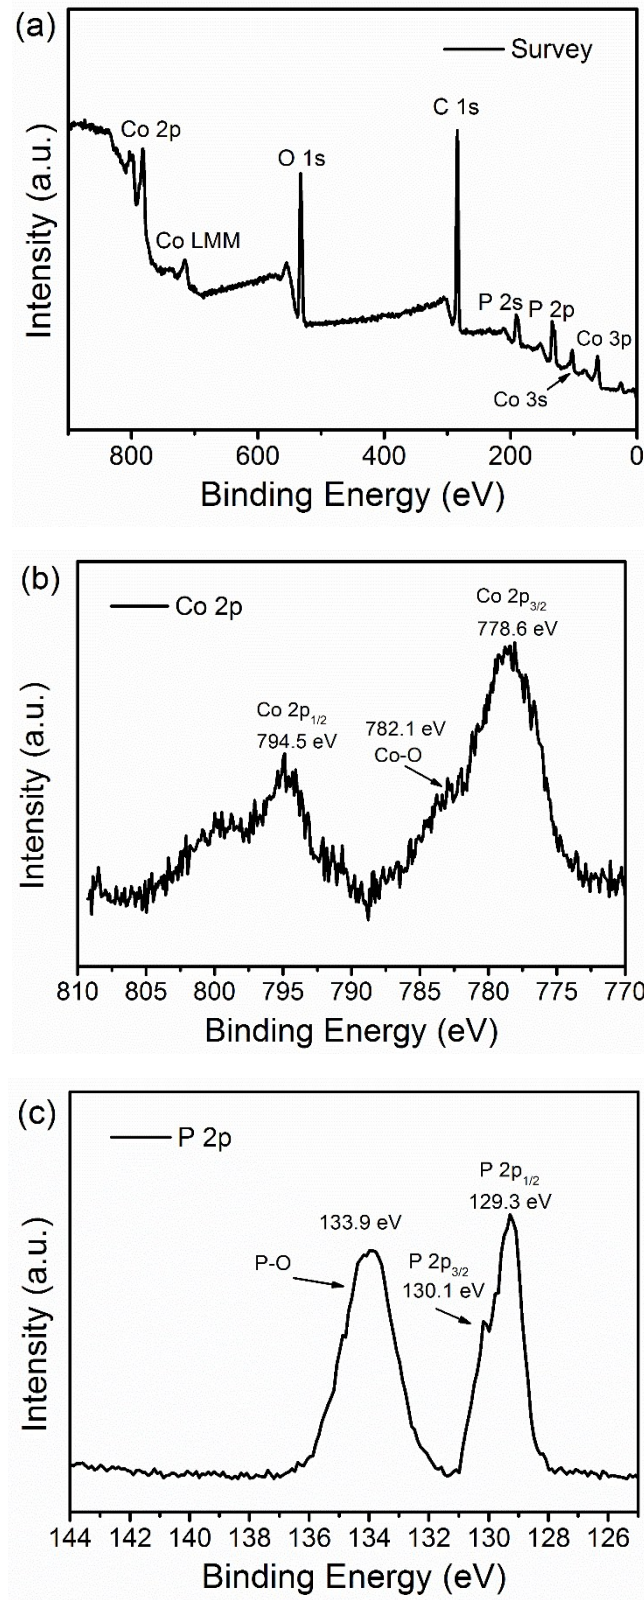

**Fig. S15** XPS spectra of the CoP<sub>3</sub> NAs/CFP: (a) survey spectrum, (b) Co 2p, and (c) P 2p.

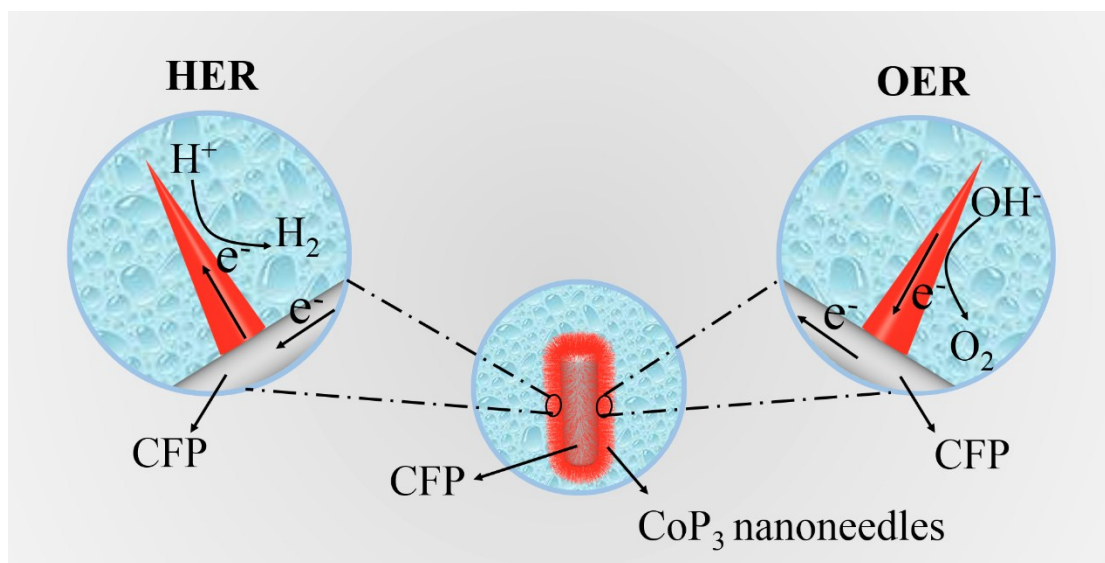

**Fig. S16** A schematic diagram to illustrate the operating principle of the HER and OER based on the CoP<sub>3</sub> NAs/CFP.

**Table S1.** Comparison of HER performance in acid media for CoP<sub>3</sub>/CFP with other TMPs HER electrocatalysts.

| Catalyst                    | Onset $\eta$ (mV) | Current density ( $j$ , mA cm <sup>-2</sup> ) | $\eta$ at the corresponding $j$ (mV) | Exchange current density (mA cm <sup>-2</sup> ) | Ref.                                           |
|-----------------------------|-------------------|-----------------------------------------------|--------------------------------------|-------------------------------------------------|------------------------------------------------|
| FeP nanosheets              | 100               | 10                                            | 240                                  | -                                               | <i>Chem. Commun.</i> , 2013, 49, 6656          |
| FeP NWs/Ti                  | 38                | 10                                            | 55                                   | 0.42                                            | <i>Angew. Chem. Int. Ed.</i> , 2014, 53, 12855 |
| FeP NWs                     | -                 | 10                                            | 96                                   | 0.17                                            | <i>Chem. Commun.</i> , 2016, 52, 2819.         |
| FeP NPs                     | 38                | 10                                            | 112                                  | -                                               | <i>Nanoscale</i> , 2015, 7, 4400               |
| FeP NAs                     | -                 | 10                                            | 85                                   | -                                               | <i>J. Mater. Chem. A</i> , 2014, 2, 17263      |
| FeP <sub>2</sub> /C         | -                 | 5                                             | 500                                  | 1.75*10 <sup>-3</sup>                           | <i>J. Mater. Chem. A</i> , 2015, 3, 499        |
| Ni <sub>2</sub> P NPs       | -                 | 20                                            | 130                                  | 2.7*10 <sup>-3</sup>                            | <i>J. Am. Chem. Soc.</i> , 2013, 135, 9267     |
| Ni <sub>2</sub> P/graphene  | 37                | 10                                            | 102                                  | 0.049                                           | <i>J. Power Sources</i> , 2015, 297, 45        |
| Ni <sub>2</sub> P/CNs       | 40                | 10                                            | 92                                   | -                                               | <i>J. Power Sources</i> , 2015, 285, 169       |
| NiP <sub>2</sub> /CC        | -                 | 10                                            | 116                                  | 0.26                                            | <i>Nanoscale</i> , 2014, 6, 13440              |
| Se doped NiP <sub>2</sub>   | -                 | 10                                            | 84                                   | -                                               | <i>ACS Catal.</i> , 2015, 5, 6355              |
| Cu <sub>3</sub> P NWs       | 62                | 10                                            | 143                                  | 0.18                                            | <i>Angew. Chem. Int. Ed.</i> , 2014, 53, 9577  |
| MoP Bulk                    | 50                | 30                                            | 180                                  | 0.034                                           | <i>Energy Environ. Sci.</i> , 2014, 7, 2624    |
| MoP NPs                     | 40                | 10                                            | 125                                  | 0.086                                           | <i>Adv. Mater.</i> , 2014, 26, 5702            |
| MoP <sub>2</sub> NPs/Mo     | -                 | 10                                            | 143                                  | 0.06                                            | <i>Nanoscale</i> , 2016, 8, 8500               |
| MoP <sub>2</sub> nanosheets | -                 | 10                                            | 58                                   | -                                               | <i>J. Mater. Chem. A</i> , 2016, 4, 7169       |
| WP                          | 50                | 10                                            | 120                                  | -                                               | <i>Chem. Commun.</i> , 2014, 50, 11026         |

|                           |    |           |           |       |                                               |
|---------------------------|----|-----------|-----------|-------|-----------------------------------------------|
| $\alpha$ -WP <sub>2</sub> | 54 | 10        | 161       | 0.017 | <i>ACS Catal.</i> , 2015, 5, 145              |
| $\beta$ -WP <sub>2</sub>  | 56 | 10        | 148       | 0.013 | <i>J. Power Sources</i> , 2015, 278, 540      |
| Co <sub>2</sub> P         | -  | 10        | 95        | -     | <i>Chem. Mater.</i> , 2015, 27, 3769          |
| CoP/CC                    | 38 | 10        | 67        | 0.288 | <i>J. Am. Chem. Soc.</i> , 2014, 136, 7587    |
| CoP NPs                   | -  | 20        | 85        | -     | <i>Angew. Chem. Int. Ed.</i> , 2014, 53, 5427 |
| CoP/CNs                   | 40 | 10        | 122       | 0.13  | <i>Angew. Chem. Int. Ed.</i> , 2014, 53, 6710 |
| CoP <sub>3</sub> /NAs     | 30 | 10<br>100 | 65<br>137 | 0.209 | This work                                     |

NPs (nanoparticles); CNs (Carbon Nanotubes); CC (Carbon Cloth); NWs (Nanowires); NAs (Nanoneedle Arrays)

**Table S2.** Comparison of HER performance in neutral media for CoP<sub>3</sub>/CFP with other HER electrocatalysts.

| Catalyst                    | Current density ( $j$ , mA cm <sup>-2</sup> ) | Potential at the corresponding $j$ (mV) | Ref.                                                 |
|-----------------------------|-----------------------------------------------|-----------------------------------------|------------------------------------------------------|
| Mo <sub>2</sub> B           | 1                                             | 250                                     | <i>Angew. Chem. Int. Ed.</i> , 2012, 51, 12703       |
| Mo <sub>2</sub> C           | 1                                             | 200                                     | <i>Angew. Chem. Int. Ed.</i> , 2012, 51, 12703       |
| H <sub>2</sub> -CoCat/FTO   | 2                                             | 385                                     | <i>Nat. Mater.</i> , 2012, 11, 802                   |
| Co-S/FTO                    | 2                                             | 83                                      | <i>J. Am. Chem. Soc.</i> , 2013, 135, 17699          |
| CuMoS <sub>4</sub>          | 2                                             | 210                                     | <i>Energy Environ. Sci.</i> , 2012, 5, 8912          |
| WP                          | 10                                            | 200                                     | <i>ACS Appl. Mater. Interfaces</i> , 2014, 6, 218740 |
| WP <sub>2</sub>             | 10                                            | 298                                     | <i>J. Power Sources</i> , 2015, 278, 540             |
| MoP <sub>2</sub> NPs/Mo     | 10                                            | 211                                     | <i>Nanoscale</i> , 2016, 8, 8500                     |
| MoP <sub>2</sub> nanosheets | 10                                            | 67                                      | <i>J. Mater. Chem. A</i> , 2016, 4, 7169             |
| CoP NWs                     | 2                                             | 65                                      | <i>J. Am. Chem. Soc.</i> , 2014, 136, 7587           |
| CoP <sub>3</sub>            | 10                                            | 165                                     | This work                                            |

**Table S3.** Comparison of HER performance in alkaline media for CoP<sub>3</sub>/CFP with other HER electrocatalysts.

| Catalyst                    | Current density ( $j$ , mA cm <sup>-2</sup> ) | Potential at the corresponding $j$ (mV) | Ref.                                                 |
|-----------------------------|-----------------------------------------------|-----------------------------------------|------------------------------------------------------|
| Ni wire                     | 10                                            | 350                                     | <i>ACS Catal.</i> , 2013, 3, 166                     |
| MoB                         | 10                                            | 225                                     | <i>Angew. Chem. Int. Ed.</i> , 2012, 51, 12703       |
| NiP <sub>2</sub>            | 10                                            | 102                                     | <i>Nanoscale</i> , 2014, 6, 13440                    |
| WP                          | 10                                            | 250                                     | <i>ACS Appl. Mater. Interfaces</i> , 2014, 6, 218740 |
| WP <sub>2</sub>             | 10                                            | 225                                     | <i>J. Power Sources</i> , 2014, 136, 7587            |
| MoP <sub>2</sub> nanosheets | 10                                            | 85                                      | <i>J. Mater. Chem. A</i> , 2016, 4, 7169             |
| MoP <sub>2</sub> NPs/Mo     | 10                                            | 194                                     | <i>Nanoscale</i> , 2016, 8, 8500                     |
| CoP nanowires               | 10                                            | 209                                     | <i>J. Am. Chem. Soc.</i> , 2014, 136, 7587           |
| CoP <sub>3</sub>            | 10                                            | 119                                     | This work                                            |

**Table S4.** Comparison of OER performance in alkaline media for CoP<sub>3</sub>/CFP with other OER electrocatalysts.

| Catalyst                             | Current density<br>( <i>j</i> mA cm <sup>-2</sup> ) | Potential at the<br>corresponding <i>j</i><br>(mV) | Ref                                                |
|--------------------------------------|-----------------------------------------------------|----------------------------------------------------|----------------------------------------------------|
| NiOOH/Ni <sub>5</sub> P <sub>4</sub> | 10                                                  | 290                                                | <i>Angew. Chem. Int. Ed.</i> , 2015, 54, 12361     |
| Ni-P/CF                              | 10                                                  | 325                                                | <i>J. Power Sources</i> , 2015, 299, 342           |
| Co-P film                            | 10                                                  | 345                                                | <i>Angew. Chem. Int. Ed.</i> , 2015, 54, 6251      |
| CoP NPs                              | 10                                                  | 360                                                | <i>ACS Catal.</i> , 2015, 5, 4066                  |
| CoP nanorods                         | 10                                                  | 320                                                | <i>ACS Catal.</i> , 2015, 5, 6874                  |
| CoP hollow                           | 10                                                  | 427                                                | <i>ACS Appl. Mater. Interfaces</i> , 2016, 8, 2158 |
| CoP <sub>2</sub> /RGO                | 10                                                  | 300                                                | <i>J. Mater. Chem. A</i> , 2016, 4, 4686           |
| CoP <sub>3</sub> NAs/CFP             | 10                                                  | 334                                                | This work                                          |
|                                      | 50                                                  | 407                                                |                                                    |
